# Supplementary material for: Recovery of Altered Diabetic Myofibroblast Heterogeneity and Gene Expression Are Associated with CD301b+ Macrophages
Source: MDPI journal article supplement (doi:10.3390/biomedicines9121752), 2021-11-24
Supplement: s1 [file s1]

Article

# Recovery of Altered Diabetic Myofibroblast Heterogeneity and Gene Expression Associated with CD301b<sup>+</sup> Macrophages

MaryEllen R. Haas <sup>1</sup>, Darlene V. Nguyen <sup>1</sup> and Brett A. Shook <sup>1,2,\*</sup>

<sup>1</sup> Department of Biochemistry and Molecular Medicine, School of Medicine and Health Sciences, The George Washington University, Washington, DC 20037, USA; mehaas@gwu.edu (M.R.H.); darlene@gwu.edu (D.V.N.)

<sup>2</sup> Department of Dermatology, School of Medicine and Health Sciences, The George Washington University, Washington, DC 20037, USA

\* Correspondence: brettshook@gwu.edu

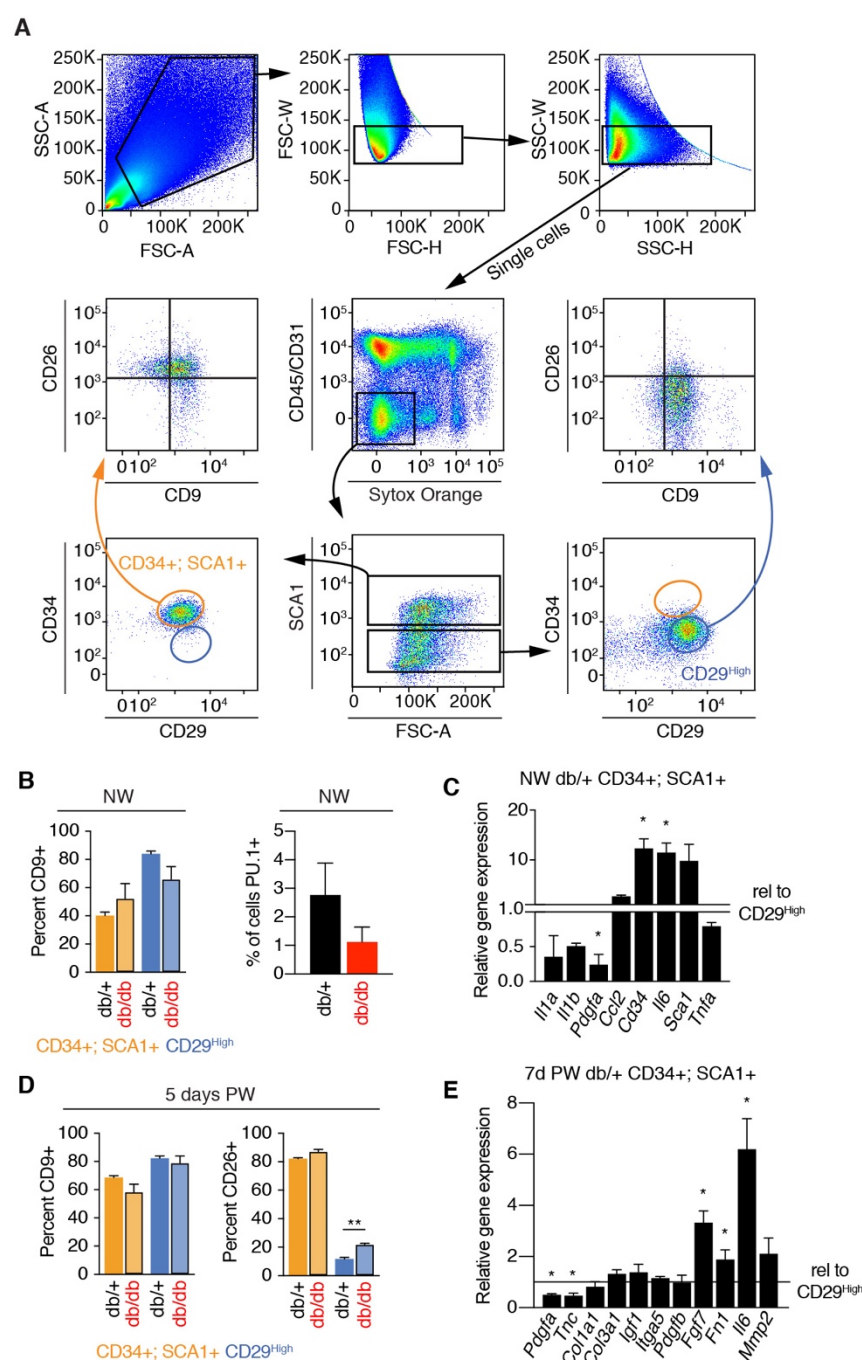

**Figure S1.** Characteristics of mesenchymal cell subsets in diabetic mouse skin and wound beds. **(A)** Gating strategy to define mesenchymal cell populations in mouse skin and wound beds. **(B)** Quantification of CD9<sup>+</sup> from flow cytometry analyzed CD34<sup>+</sup>; SCA1<sup>+</sup> and CD29<sup>High</sup> cells and quantification of PU.1<sup>+</sup> cells in immunostained tissue sections from non-wounded (NW) db/+ and db/db mouse skin. **(C)** Quantitative RT-PCR analysis of genes that characterize CD34<sup>+</sup>; SCA1<sup>+</sup> and CD29<sup>High</sup> mesenchymal cell subsets in uninjured skin. Results show the expression levels in CD34<sup>+</sup>; SCA1<sup>+</sup> cells relative to CD29<sup>High</sup> mesenchymal cells. **(D)** Flow cytometry quantification of CD9<sup>+</sup> and CD26<sup>+</sup> colocalization in myofibroblast subsets from db/+ and db/db mouse skin wounds isolated 5-days post-wounding (PW). **(E)** Quantitative RT-PCR analysis of genes that characterize CD34<sup>+</sup>; SCA1<sup>+</sup> and CD29<sup>High</sup> myofibroblast subsets. Cell populations were isolated from wound beds 7-days PW. Results show the expression levels in CD34<sup>+</sup>; SCA1<sup>+</sup> myofibroblasts relative to CD29<sup>High</sup> myofibroblasts.  $n = 3-5$  for each condition. Error bars indicate mean  $\pm$  SEM. \* $p < 0.05$ .

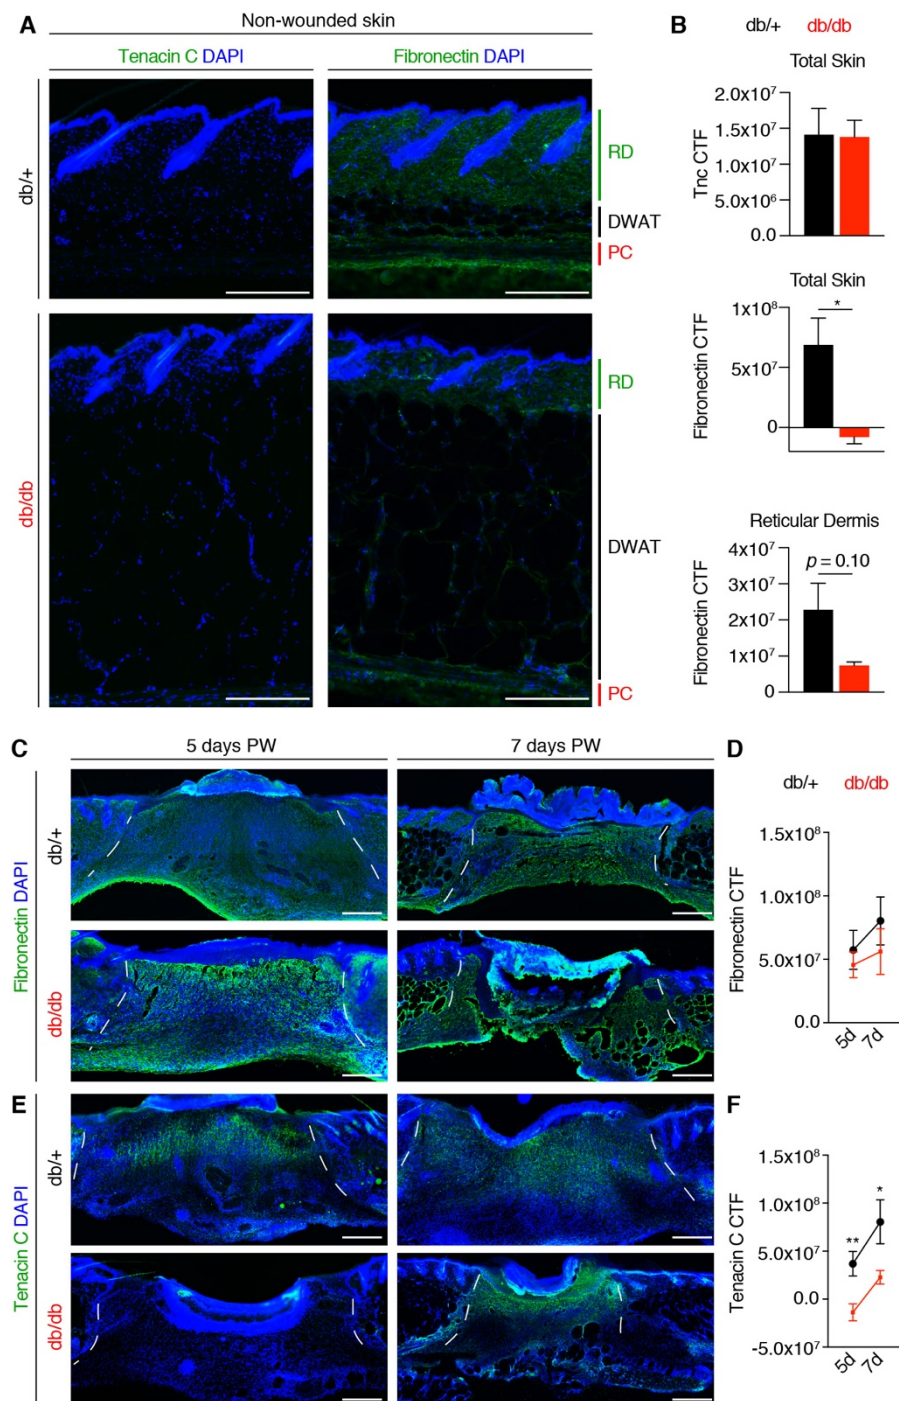

**Figure S2.** ECM composition is altered in diabetic mouse skin and wound beds. **(A)** Sections from db/+ and db/db mouse skin were immunostained for tenascin C and fibronectin. **(B)** Quantification of relative fluorescent intensity of tenascin C and fibronectin in uninjured skin. **(C–D)** Images from tissue sections were immunostained for fibronectin **(C)** and the relative intensity of the signal was quantified **(D)** in wound beds 5- and 7-days post-wounding (PW). **(E–F)** Images from tissue sections were immunostained for tenascin C **(E)** and the relative intensity of the signal was quantified **(F)** in wound beds 5- and 7-days post-wounding (PW). White dashed lines delineate wound edges. Scale bars, 250  $\mu$ m.  $n = 3$ –6 for each condition. Error bars indicate mean  $\pm$  SEM. \* $p < 0.05$ , \*\* $p < 0.01$ . CTF, corrected total fluorescence.
