# Supplementary material for: Recovery of Altered Diabetic Myofibroblast Heterogeneity and Gene Expression Are Associated with CD301b+ Macrophages
Source: Biomedicines. 2021 Nov 24;9(12):1752. doi: 10.3390/biomedicines9121752 (PMC8698992; doi:10.3390/biomedicines9121752)
Supplement: Supplementary file 1 [file biomedicines-09-01752-s001.zip › biomedicines-1432995-supplementary Table S1_qPCR primers.xlsx]

## Sheet: aPCR Primers
Supplementary Table S1: qPCR Primers
Gene	Primer sequence (5'-3')
Ccl2	Forward	GTGCTGACCCCAAGAAGGAA
	Reverse	GTGCTGAAGACCTTAGGGCA
Cd34	Forward	CTGGAATCCGAGAAGTGAGGTTGG
	Reverse	AGTTTGCTGGGAATTCTGTGCTATTG
Col1a1	Forward	ACGTCCTGGTGAAGTTGGTC
	Reverse	TCCAGCAATACCCTGAGGTC
Col3a1	Forward	CTGGTCCTGTTGGTCCATCT
	Reverse	ACCTTTGTCACCTCGTGGAC
Cxcl1	Forward	TGGCTGGGATTCACCTCAAG
	Reverse	CCGTTACTTGGGGACACCTT
Cxcl2	Forward	CACTCTCAAGGGCGGTCAAA
	Reverse	TGGTTCTTCCGTTGAGGGAC
Fgf7	Forward	AGCGGAGGGGAAATGTTCG
	Reverse	TCCAGCCTTTCTTGGTTACTGAGA
Fn1	Forward	CTACCCTGCAGCCTCTGCGC
	Reverse	TCACCTCCCTGGCTCGGTCG
Igf1	Forward	GCCCAAGACTCAGAAGTCCCCG
	Reverse	TGCAGGTTGCTCAAGCAGCA
Il1a	Forward	TTGGTTAAATGACCTGCAACA
	Reverse	GAGCGCTCACGAACAGTTG
Il1b	Forward	TTGACGGACCCCAAAAGAT
	Reverse	GAAGCTGGATGCTCTCATCTG
Il6	Forward	AGCCCACCAAGAACGATAGTC
	Reverse	TTGTGAAGTAGGGAAGGCCG
Itga5	Forward	GAATGGGGTGAATGGGACAGGA
	Reverse	ATGGCTTTGACAATGCACTTACAGAT
Ly6a	Forward	CCTGCTGGTAGGTAGGTGCTCT
	Reverse	AACAGGGACATTCAGGATACAT
Mmp2	Forward	CTTCGCTCGTTTCCTTCAAC
	Reverse	ATGTCAGACAACCCGAGTCC
Pdgfra	Forward	ACGCATGCGGGTGGACTC
	Reverse	GATACCCGGAGCGTGTCAGTTAC
Pdgfb	Forward	GCCGGTCCAGGTGAGAAAGATT
	Reverse	AGGCCGAGGGGTCACTACTGTC
Tnc	Forward	GGAGCCAGGGCAAGAATACA
	Reverse	ATGGCCGTGGATGCCTTC
Tnf	Forward	AAGAGGCACTCCCCCAAAAG
	Reverse	ATCCCTTTGGGGACCGATCA
Tnfa	Forward	TTCCAGATTCTTCCCTGAGGT
	Reverse	TAAGCAAAAGAGGAGGCAACA
Thy1	Forward	TCTCAGGCACCCTTGGGATA
	Reverse	GTAGTCGCCCTCATCCTTGG
Vegfa	Forward	AGGGGCGGGGTGCTTTGTAGACT
	Reverse	CGACACGGGAGACAATGGGATGAA
